# Supplementary material
Source: publisher site journal article supplement (https://study.sagepub.com/sites/default/files/05%20Bloomberg%203e%20Appendix%20L.pdf)
Supplement: Supplementary file 1 [file 05%20Bloomberg%203e%20Appendix%20L.pdf]

## Appendix L. Sample Coding Legend/Schema

---

### 1. Preparedness for Dissertation Process

**P1** Very prepared

**P2** Unprepared

**P3** Somewhat prepared

### 2. Knowledge, Skills, Attitudes/KSA (what they think they needed)

**KSA1** Knowledge of the content; knowing what was required

**KSA2** Understanding of the process; knowing how to do it

**KSA3** Assertiveness

### 3. How They Learned

Formal Learning

**FORM1** Course work

**FORM2** Post–course work seminars

**FORM3** Advisors and other faculty

Informal Learning

**INFORM1** Dialogue with colleagues

**INFORM2** Researching

**INFORM3** Reading

### 4. Perceptions of Facilitators

**FAC1** Advisor

**FAC2** Other faculty

**FAC3** Colleagues/classmates

**FAC4** Personal attributes

### 5. Perceptions of Impediments

**IMPED1** Advisor

**IMPED2** Faculty/administration

**IMPED3** Rigidity of the process

**IMPED4** Personal and family issues

**IMPED5** Professional demands

**IMPED6** Financial constraints

**IMPED7** Lack of confidence in ability
